# Supplementary material for: ING4 suppresses tumor angiogenesis and functions as a prognostic marker in human colorectal cancer
Source: PubMed Central journal article supplement (PMC5346695; doi:10.18632/oncotarget.12984), 2016-10-27
Supplement: oncotarget-07-79017-s001.pdf [file oncotarget-07-79017-s001.pdf]

## ING4 suppresses tumor angiogenesis and functions as a prognostic marker in human colorectal cancer

### Supplementary Materials

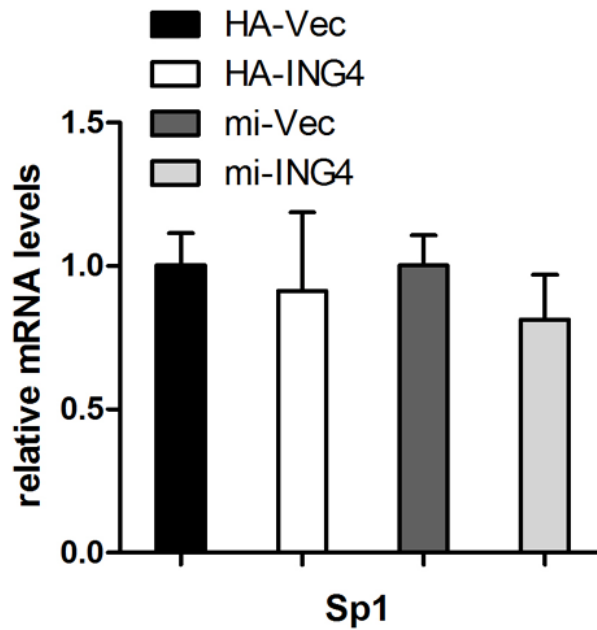

Supplementary Figure S1: The real time PCR confirmed that ING4 had no effect of Sp1 mRNA expression in p53<sup>+/+</sup>HCT116 cells.

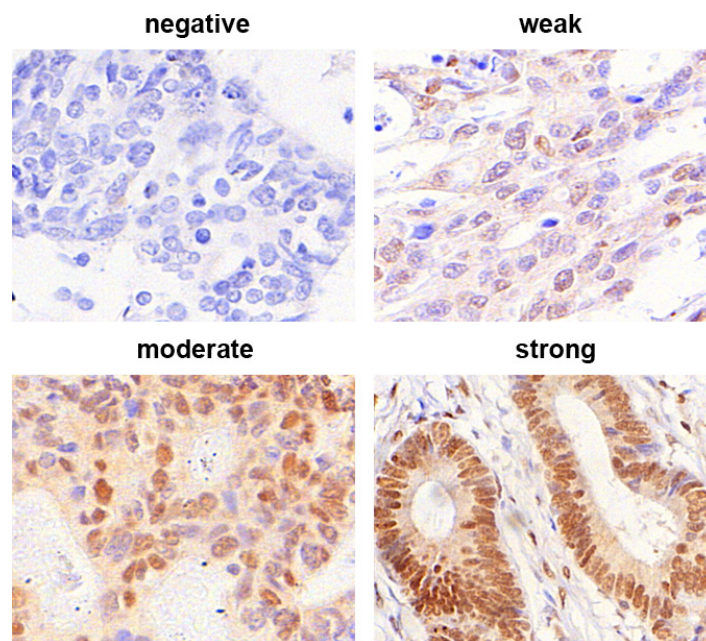

Supplementary Figure S2: Representative images of ING4 immunohistochemical staining in human CRC tissues. Note: original magnification,  $\times 400$ .

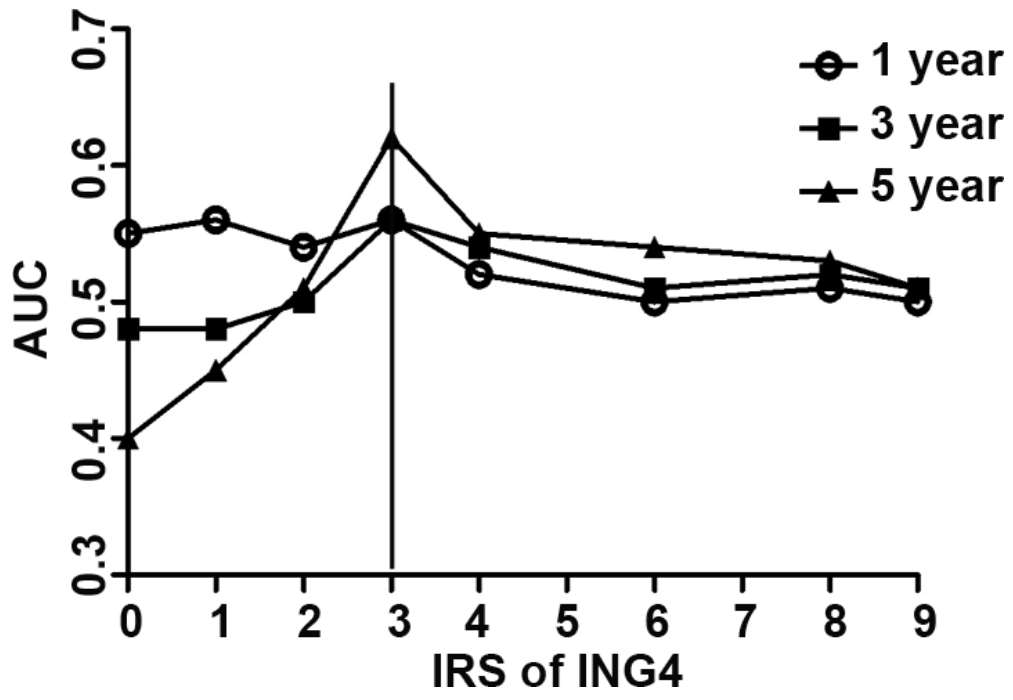

**Supplementary Figure S3: ROC is obtained to determine the optimal cutoff value of ING4 expression.** ROC obtains the area under the curves (AUCs) at different cutoff values of ING4 IRS for 1, 3 and 5 years of overall survival time
